# Supplementary material
Source: publisher figshare collection journal article supplement (https://frontiersin.figshare.com/ndownloader/files/12358436)
Supplement: Supplementary file [file 12358436]

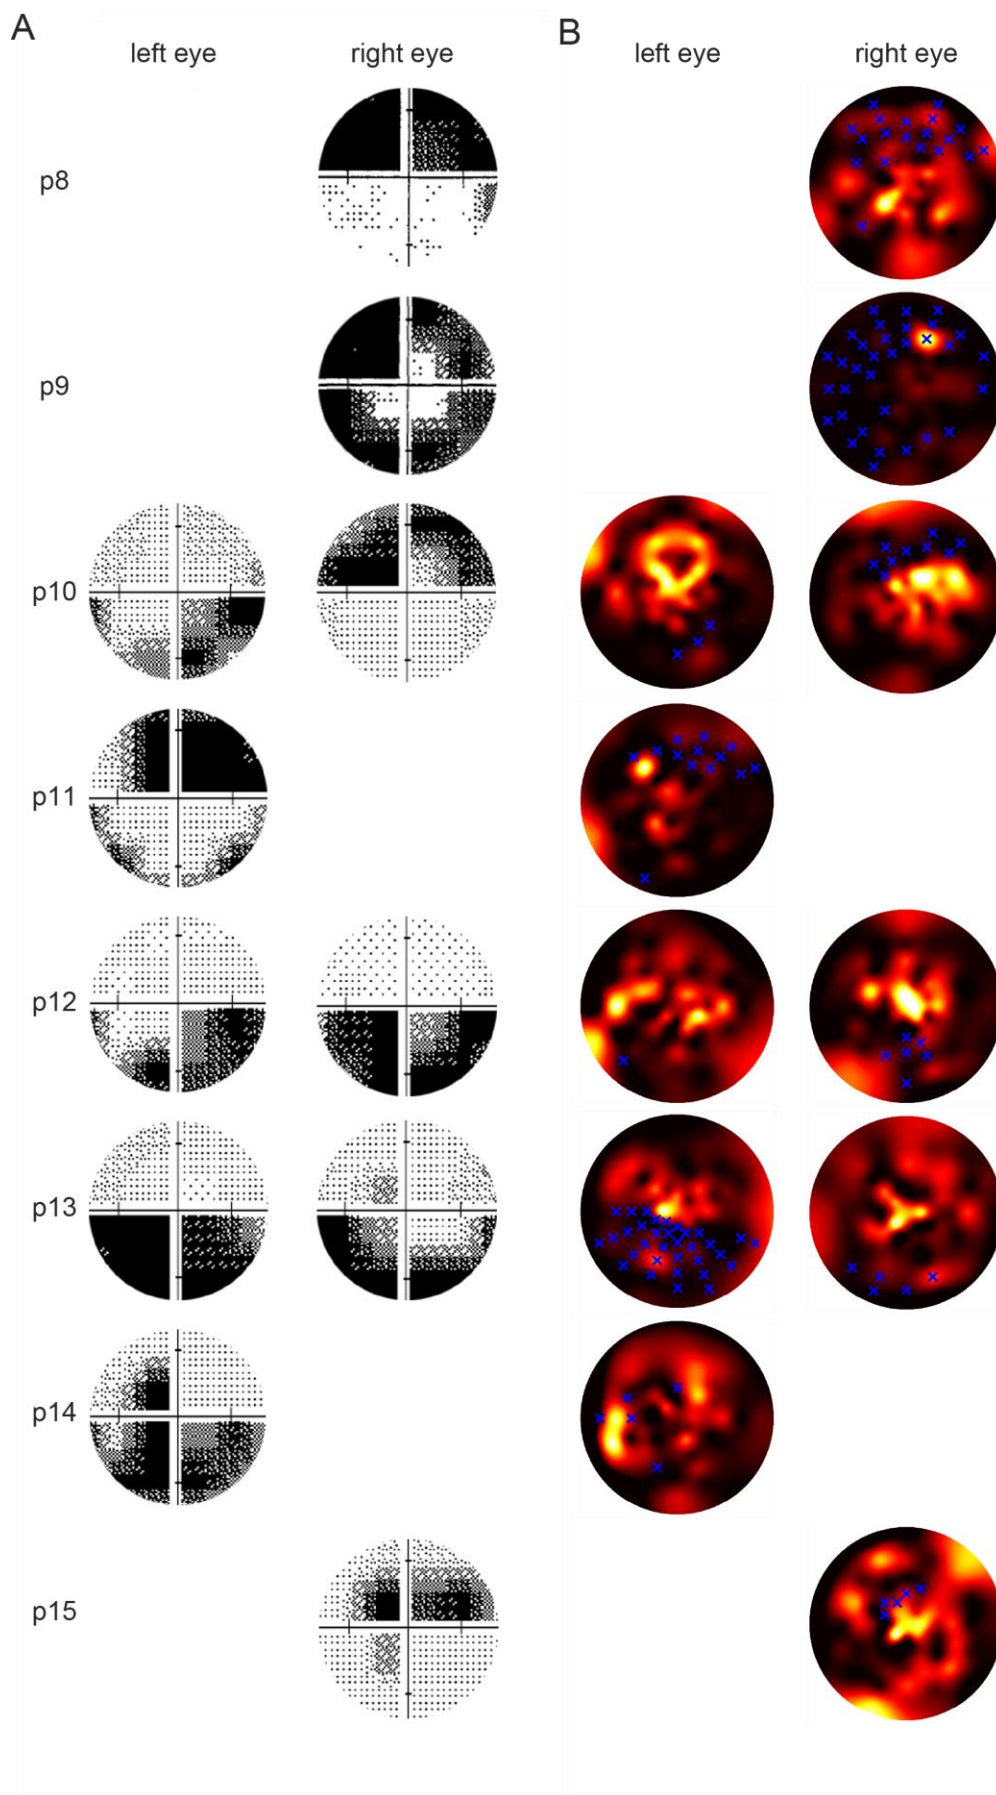

**Figure S2.** Same as Fig 1 but now for glaucoma patients.
